# Supplementary material for: Resmetirom for nonalcoholic fatty liver disease: a randomized, double-blind, placebo-controlled phase 3 trial
Source: PubMed Central journal article supplement (PMC10667098; doi:10.1038/s41591-023-02603-1), 2023-10-16
Supplement: 41591_2023_2603_MOESM1_ESM.pdf [file 41591_2023_2603_MOESM1_ESM.pdf]

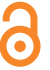

---

# Resmetirom for nonalcoholic fatty liver disease: a randomized, double-blind, placebo-controlled phase 3 trial

---

In the format provided by the authors and unedited

---

Supplemental Data Tables

**Supplement Data Table 1.** Sex hormones at baseline and change from baseline<sup>a</sup> at Week 52 (observed data)

|                                 | Resmetirom 100mg OL<br>(n=169) |              | Resmetirom 100mg DB<br>(n=314) |                                 |             | Resmetirom 80mg DB<br>(n=320) |                                 |             | Placebo<br>DB<br>(n=309)   |
|---------------------------------|--------------------------------|--------------|--------------------------------|---------------------------------|-------------|-------------------------------|---------------------------------|-------------|----------------------------|
|                                 | LSM<br>CFB or<br>%CFB<br>(SE)  | 95% CI       | LSM<br>CFB or<br>%CFB<br>(SE)  | LSM<br>Difference<br>(97.5% CI) | p-<br>value | LSM<br>CFB or<br>%CFB<br>(SE) | LSM<br>Difference<br>(97.5% CI) | p-<br>value | LSM CFB<br>or %CFB<br>(SE) |
| <b>Estradiol, ng/L (female)</b> |                                |              |                                |                                 |             |                               |                                 |             |                            |
| N                               | 105                            |              | 145                            |                                 |             | 138                           |                                 |             | 127                        |
| Baseline mean<br>(SD)           | 35.7 (58.7)                    |              | 41.9 (66.5)                    |                                 |             | 37.4 (70.0)                   |                                 |             | 38.6 (59.6)                |
| Week 52 CFB<br>(SE)             | 11.0 (8.8)                     | -6.3 to 28.4 | 7.5 (8.2)                      | 9.5<br>(-9.5 to 28.6)           | 0.26        | 5.0 (8.3)                     | 7.1<br>(-12.2 to 26.3)          | 0.41        | -2.1 (8.4)                 |
| <b>Estradiol, ng/L (male)</b>   |                                |              |                                |                                 |             |                               |                                 |             |                            |
| N                               | 46                             |              | 118                            |                                 |             | 111                           |                                 |             | 129                        |
| Baseline mean<br>(SD)           | 28.4 (10.7)                    |              | 34.3 (14.2)                    |                                 |             | 35.9 (18.5)                   |                                 |             | 32.8 (14.9)                |
| Week 52 CFB<br>(SE)             | 11.7 (2.2)                     | 7.4 to 15.9  | 8.9 (1.5)                      | 10.4<br>(6.8 to 14.1)           | <0.000<br>1 | 3.3 (1.5)                     | 4.8<br>(1.1 to 8.6)             | 0.0037      | -1.5 (1.5)                 |
| <b>FSH, IU/L (female)</b>       |                                |              |                                |                                 |             |                               |                                 |             |                            |
| N                               | 105                            |              | 145                            |                                 |             | 138                           |                                 |             | 126                        |
| Baseline mean<br>(SD)           | 36.4 (25.7)                    |              | 40.0 (27.5)                    |                                 |             | 41.5 (25.7)                   |                                 |             | 38.0 (25.2)                |
| Week 52 CFB<br>(SE)             | 1.3 (1.2)                      | -1.0 to 3.6  | 1.6 (1.1)                      | -0.4<br>(-2.9 to 2.1)           | 0.72        | 0.9 (1.1)                     | -1.1<br>(-3.6 to 1.5)           | 0.35        | 2.0 (1.1)                  |
| <b>FSH, IU/L (male)</b>         |                                |              |                                |                                 |             |                               |                                 |             |                            |
| N                               | 46                             |              | 118                            |                                 |             | 111                           |                                 |             | 129                        |
| Baseline mean<br>(SD)           | 6.3 (3.3)                      |              | 6.3 (5.2)                      |                                 |             | 6.6 (7.1)                     |                                 |             | 6.5 (5.9)                  |



|                    |                 |                   |                  |                            |      |                 |                           |        |   |                  |
|--------------------|-----------------|-------------------|------------------|----------------------------|------|-----------------|---------------------------|--------|---|------------------|
| n                  | 45              |                   |                  | 115                        |      |                 | 108                       |        |   | 127              |
| Baseline mean (SD) | 0.0690 (0.0218) |                   |                  | 0.0718 (0.0315)            |      |                 | 0.0758 (0.0498)           |        |   | 0.0713 (0.0370)  |
| Week 52 CFB (SE)   | 0.024 (0.0054)  | -0.0081 to 0.0130 | -0.0009 (0.0038) | 0.0029 (-0.0061 to 0.0120) | 0.48 | 0.0077 (0.0037) | 0.0115 (0.0023 to 0.0208) | 0.0005 | 4 | -0.0038 (0.0036) |

<sup>a</sup>Sex hormones reported as change from baseline (CFB) at Week 52.

CFB, change from baseline; CI, confidence interval; DB, double-blind; FSH, follicle-stimulating hormone; LH, luteinizing hormone; LSM, least squares mean; OL, open-label; SD, standard deviation; SE, standard error; SHBG, sex hormone binding globulin.

**Supplement Data Table 2.** Sex hormone binding globulin (SHBG) at baseline and change from baseline<sup>a</sup> at Week 52 (observed data)

|                              | Resmetirom 100mg OL<br>(n=169) |                   | Resmetirom 100mg DB<br>(n=314) |                                 | p-value | Resmetirom 80mg DB<br>(n=320) |                                 | p-value | Placebo DB<br>(n=309)      |
|------------------------------|--------------------------------|-------------------|--------------------------------|---------------------------------|---------|-------------------------------|---------------------------------|---------|----------------------------|
|                              | LSM<br>CFB or<br>%CFB<br>(SE)  | 95% CI            | LSM<br>CFB or<br>%CFB<br>(SE)  | LSM<br>Difference<br>(97.5% CI) |         | LSM<br>CFB or<br>%CFB<br>(SE) | LSM<br>Difference<br>(97.5% CI) |         | LSM CFB<br>or %CFB<br>(SE) |
| <b>SHBG, nmol/L</b>          |                                |                   |                                |                                 |         |                               |                                 |         |                            |
| N                            | 151                            |                   | 263                            |                                 |         | 248                           |                                 |         | 255                        |
| Baseline mean (SD)           | 37.7 (24.4)                    |                   | 35.8 (19.8)                    |                                 |         | 35.8 (20.7)                   |                                 |         | 35.1 (18.7)                |
| Week 52 %CFB (SE)            | 182.6<br>(13.0)                | 157.0 to<br>208.1 | 161.1<br>(11.0)                | 157.5<br>(131.5 to 183.4)       | <0.0001 | 99.6<br>(10.9)                | 96.0<br>(69.6 to 122.4)         | <0.0001 | 3.6 (10.9)                 |
| Week 52 CFB (SE)             | 60.3 (4.4)                     | 51.7 to 68.9      | 53.0 (3.7)                     | 52.4<br>(43.6 to 61.2)          | <0.0001 | 32.7 (3.7)                    | 32.1<br>(23.2 to 41.0)          | <0.0001 | 0.6 (3.7)                  |
| <b>SHBG, nmol/L (female)</b> |                                |                   |                                |                                 |         |                               |                                 |         |                            |
| N                            | 105                            |                   | 145                            |                                 |         | 137                           |                                 |         | 126                        |
| Baseline mean (SD)           | 38.7 (26.0)                    |                   | 38.9 (22.7)                    |                                 |         | 40.7 (24.1)                   |                                 |         | 36.8 (20.5)                |
| Week 52 %CFB (SE)            | 199.3<br>(19.6)                | 160.8 to<br>237.8 | 197.6<br>(18.2)                | 184.0<br>(141.5 to 226.5)       | <0.0001 | 133.0<br>(18.4)               | 119.5 (76.3 to<br>162.6)        | <0.0001 | 13.5 (18.7)                |
| Week 52 CFB (SE)             | 68.6 (6.6)                     | 55.5 to 81.4      | 65.3 (6.1)                     | 61.8<br>(47.5 to 76.1)          | <0.0001 | 43.3 (6.2)                    | 39.9<br>(25.4 to 54.4)          | <0.0001 | 3.5 (6.3)                  |
| <b>SHBG, nmol/L (male)</b>   |                                |                   |                                |                                 |         |                               |                                 |         |                            |
| N                            | 46                             |                   | 118                            |                                 |         | 111                           |                                 |         | 129                        |
| Baseline mean (SD)           | 35.5 (20.2)                    |                   | 32.1 (14.8)                    |                                 |         | 29.8 (13.4)                   |                                 |         | 33.5 (16.6)                |
| Week 52 %CFB (SE)            | 156.0<br>(14.8)                | 126.9 to<br>185.1 | 122.9<br>(10.5)                | 125.5<br>(100.4 to 150.5)       | <0.0001 | 67.1<br>(10.2)                | 69.7<br>(44.1 to 95.2)          | <0.0001 | -2.6 (10.0)                |
| Week 52 CFB (SE)             | 44.7 (5.0)                     | 34.8 to 54.6      | 39.2 (3.6)                     | 41.7 (3.8)<br>(33.2 to 50.2)    | <0.0001 | 21.9 (3.5)                    | 24.5 (3.9)<br>(15.8 to 33.2)    | <0.0001 | -2.5 (3.4)                 |

<sup>a</sup> Sex hormone binding globulin (SHBG) reported as both change from baseline (CFB) and percent change from baseline (%CFB) at Week 52.

CFB, change from baseline; CI, confidence interval; DB, double-blind; LSM, least squares mean; OL, open-label; SE, standard error; SHBG, sex hormone binding globulin.

**Supplement Data Table 3.** Thyroid hormones at baseline and change from baseline<sup>a</sup> at Week 52 (observed data)

|                                       | Resmetirom 100mg OL<br>(n=169) |                | Resmetirom 100mg DB<br>(n=314) |                                 |             | Resmetirom 80mg DB<br>(n=320) |                                 |             | Placebo<br>DB<br>(n=309)      |
|---------------------------------------|--------------------------------|----------------|--------------------------------|---------------------------------|-------------|-------------------------------|---------------------------------|-------------|-------------------------------|
|                                       | LSM<br>CFB or<br>%CFB<br>(SE)  | 95% CI         | LSM<br>CFB or<br>%CFB<br>(SE)  | LSM<br>Difference<br>(97.5% CI) | p-<br>value | LSM<br>CFB or<br>%CFB<br>(SE) | LSM<br>Difference<br>(97.5% CI) | p-<br>value | LSM<br>CFB or<br>%CFB<br>(SE) |
| <b>FT3, ng/L (not on thyroxine)</b>   |                                |                |                                |                                 |             |                               |                                 |             |                               |
| n                                     |                                | 81             |                                | 234                             |             |                               | 217                             |             | 231                           |
| Baseline mean (SD)                    |                                | 3.0 (0.4)      |                                | 3.0 (0.4)                       |             |                               | 2.9 (0.4)                       |             | 3.0 (0.4)                     |
| Week 52 CFB                           | -0.1 (0.1)                     | -0.2 to 0.0    | -0.1 (0.0)                     | 0.0<br>(-0.1 to 0.1)            | 0.84        | -0.1 (0.0)                    | 0.1<br>(-0.0 to 0.2)            | 0.19        | -0.1 (0.0)                    |
| <b>FT3, ng/L (thyroxine-treated)</b>  |                                |                |                                |                                 |             |                               |                                 |             |                               |
| n                                     |                                | 70             |                                | 29                              |             |                               | 33                              |             | 26                            |
| Baseline mean (SD)                    |                                | 2.7 (0.6)      |                                | 2.6 (0.4)                       |             |                               | 2.9 (0.7)                       |             | 2.7 (0.4)                     |
| Week 52 CFB                           | -0.1 (0.1)                     | -0.3 to 0.0    | -0.0 (0.1)                     | -0.0<br>(-0.3 to 0.3)           | 0.98        | 0.0 (0.1)                     | 0.0<br>(-0.2 to 0.3)            | 0.80        | -0.0 (0.1)                    |
| <b>FT4, ng/dL (not on thyroxine)</b>  |                                |                |                                |                                 |             |                               |                                 |             |                               |
| n                                     |                                | 81             |                                | 234                             |             |                               | 217                             |             | 231                           |
| Baseline mean (SD)                    |                                | 1.1 (0.2)      |                                | 1.1 (0.2)                       |             |                               | 1.1 (0.2)                       |             | 1.1 (0.2)                     |
| Week 52 %CFB                          | -18.9<br>(2.2)                 | -23.3 to -14.5 | -14.3 (1.6)                    | -15.4<br>(-19.0 to -<br>11.7)   | <0.000<br>1 | -9.9 (1.5)                    | -11.0<br>(-14.7 to -<br>7.3)    | <0.000<br>1 | 1.1 (1.6)                     |
| Week 52 CFB                           | -0.2 (0.0)                     | -0.3 to -0.2   | -0.2 (0.0)                     | -0.2<br>(-0.2 to -0.1)          | <0.000<br>1 | -0.1 (0.0)                    | -0.1<br>(-0.2 to -0.1)          | <0.000<br>1 | 0.0 (0.0)                     |
| <b>FT4, ng/dL (thyroxine-treated)</b> |                                |                |                                |                                 |             |                               |                                 |             |                               |
| n                                     |                                | 70             |                                | 29                              |             |                               | 33                              |             | 26                            |
| Baseline mean (SD)                    |                                | 1.3 (0.2)      |                                | 1.1 (0.2)                       |             |                               | 1.3 (0.3)                       |             | 1.2 (0.2)                     |
| Week 52 %CFB                          | -14.8<br>(3.0)                 | -20.8 to -8.8  | -19.2 (3.8)                    | -23.0<br>(-33.5 to -<br>12.5)   | <0.01       | -6.4 (3.9)                    | -10.2<br>(-20.3 to<br>0.0)      | 0.0251      | 3.8 (3.9)                     |
| Week 52 CFB                           | -0.2 (0.0)                     | -0.3 to -0.1   | -0.2 (0.0)                     | -0.3<br>(-0.4 to -0.1)          | <0.000<br>1 | -0.1 (0.0)                    | -0.1<br>(-0.3 to -0.0)          | 0.0118      | 0.0 (0.0)                     |

**rT3, ng/dL (not on thyroxine)**

|                    |            |              |            |                        |             |            |                        |             |           |
|--------------------|------------|--------------|------------|------------------------|-------------|------------|------------------------|-------------|-----------|
| n                  | 82         |              | 236        |                        | 217         |            | 231                    |             |           |
| Baseline mean (SD) | 16.5 (5.1) |              | 16.1 (4.2) |                        | 17.5 (4.9)  |            | 16.5 (4.4)             |             |           |
| Week 52 CFB        | -3.5 (0.5) | -4.4 to -2.6 | -2.9 (0.3) | -3.8<br>(-4.5 to -3.0) | <0.000<br>1 | -2.5 (0.3) | -3.3<br>(-4.1 to -2.6) | <0.000<br>1 | 0.9 (0.3) |

**rT3, ng/dL (thyroxine-treated)**

|                    |            |              |            |                        |             |            |                        |        |           |
|--------------------|------------|--------------|------------|------------------------|-------------|------------|------------------------|--------|-----------|
| n                  | 70         |              | 29         |                        | 33          |            | 26                     |        |           |
| Baseline mean (SD) | 20.1 (5.3) |              | 18.1 (6.8) |                        | 19.6 (5.6)  |            | 18.6 (5.5)             |        |           |
| Week 52 CFB        | -3.9 (0.8) | -5.5 to -2.2 | -4.9 (1.0) | -5.5<br>(-8.3 to -2.7) | <0.000<br>1 | -3.8 (1.0) | -4.4<br>(-7.1 to -1.7) | 0.0004 | 0.6 (1.0) |

**FT3/rT3 (not on thyroxine)**

|                    |                |              |                |                        |              |                |                         |             |                 |
|--------------------|----------------|--------------|----------------|------------------------|--------------|----------------|-------------------------|-------------|-----------------|
| n                  | 81             |              | 234            |                        | 216          |                | 230                     |             |                 |
| Baseline mean (SD) | 0.20 (0.006)   |              | 0.20 (0.006)   |                        | 0.18 (0.006) |                | 0.19<br>(0.006)         |             |                 |
| Week 52 CFB        | 0.05<br>(0.01) | 0.03 to 0.07 | 0.04<br>(0.01) | 0.05 (0.04 to<br>0.07) | <0.000<br>1  | 0.04<br>(0.01) | 0.05 (0.04 to<br>0.006) | <0.000<br>1 | -0.01<br>(0.01) |

**FT3/rT3 (thyroxine-treated)**

|                    |                |              |                |                        |             |                |                        |        |                |
|--------------------|----------------|--------------|----------------|------------------------|-------------|----------------|------------------------|--------|----------------|
| n                  | 70             |              | 29             |                        | 33          |                | 26                     |        |                |
| Baseline mean (SD) | 0.14 (0.07)    |              | 0.16 (0.05)    |                        | 0.16 (0.07) |                | 0.16<br>(0.06)         |        |                |
| Week 52 CFB        | 0.03<br>(0.01) | 0.01 to 0.05 | 0.04<br>(0.01) | 0.04 (0.01 to<br>0.07) | <0.002<br>3 | 0.03<br>(0.01) | 0.03 (0.00 to<br>0.06) | 0.0136 | 0.00<br>(0.01) |

**TSH, mIU/L (not on thyroxine)**

|                    |            |              |            |                       |           |            |                      |      |            |
|--------------------|------------|--------------|------------|-----------------------|-----------|------------|----------------------|------|------------|
| n                  | 81         |              | 234        |                       | 217       |            | 230                  |      |            |
| Baseline mean (SD) | 2.2 (1.3)  |              | 2.2 (1.3)  |                       | 2.0 (1.1) |            | 2.2 (1.0)            |      |            |
| Week 52 CFB        | -0.2 (0.1) | -0.4 to -0.0 | -0.3 (0.1) | -0.1<br>(-0.2 to 0.1) | 0.33      | -0.3 (0.1) | 0.0<br>(-0.1 to 0.2) | 0.96 | -0.3 (0.1) |

**TSH, mIU/L (thyroxine-treated)**

|                    |           |             |            |                      |           |            |                       |      |            |
|--------------------|-----------|-------------|------------|----------------------|-----------|------------|-----------------------|------|------------|
| n                  | 70        |             | 29         |                      | 33        |            | 26                    |      |            |
| Baseline mean (SD) | 2.4 (2.3) |             | 3.0 (4.4)  |                      | 1.6 (1.2) |            | 2.2 (1.6)             |      |            |
| Week 52 CFB        | 0.4 (1.2) | -1.9 to 2.7 | -0.6 (1.5) | 0.0<br>(-4.0 to 4.1) | 0.99      | -0.9 (1.5) | -0.3<br>(-4.2 to 3.7) | 0.89 | -0.6 (1.5) |

**TBG, mg/L (not on thyroxine)**

|   |    |  |     |  |     |  |     |
|---|----|--|-----|--|-----|--|-----|
| n | 82 |  | 234 |  | 214 |  | 230 |
|---|----|--|-----|--|-----|--|-----|

|                                      |            |             |            |                       |      |            |                        |            |           |
|--------------------------------------|------------|-------------|------------|-----------------------|------|------------|------------------------|------------|-----------|
| Baseline mean (SD)                   | 22.8 (4.7) |             | 21.3 (6.4) |                       |      | 21.5 (6.0) |                        | 21.3 (5.3) |           |
| Week 52 CFB                          | 0.7 (0.6)  | -0.6 to 1.9 | 1.4 (0.5)  | -0.3<br>(-1.3 to 0.8) | 0.56 | -0.5 (0.4) | -1.2<br>(-2.2 to -0.1) | 0.01       | 1.7 (0.4) |
| <b>TBG, mg/L (thyroxine-treated)</b> |            |             |            |                       |      |            |                        |            |           |
| n                                    | 70         |             | 29         |                       |      | 33         |                        | 26         |           |
| Baseline mean (SD)                   | 25.3 (7.4) |             | 24.5 (6.0) |                       |      | 22.0 (7.6) |                        | 20.3 (7.2) |           |
| Week 52 CFB                          | -1.0 (0.8) | -2.6 to 0.6 | -0.2 (1.0) | -2.4<br>(-5.2 to 0.5) | 0.06 | 1.5 (1.0)  | -0.6<br>(-3.3 to 2.1)  | 0.61       | 2.1 (1.1) |

<sup>a</sup> Free thyroxine (FT4) reported as both change from baseline (CFB) and percent change from baseline (%CFB) at Week 52. All other thyroid hormones reported as change from baseline (CFB) at Week 52.

CFB, change from baseline; CI, confidence interval; DB, double-blind; LSM, least squares mean; OL, open-label; rT3, reverse triiodothyronine; SD, standard deviation; SE, standard error; FT3, free triiodothyronine; FT4, free thyroxine; TBG, thyroxine binding globulin; TSH, thyroid-stimulating hormone.



**Supplement Data Table 4.** Biomarkers, lipids, and lipoproteins at baseline and percent change from baseline<sup>a</sup>

|                              | Resmetirom 100mg OL<br>(n=169) |                    | Resmetirom 100mg DB<br>(n=314) |                                 |             | Resmetirom 80mg DB<br>(n=320) |                                 |             | Placebo<br>DB<br>(n=309)    |
|------------------------------|--------------------------------|--------------------|--------------------------------|---------------------------------|-------------|-------------------------------|---------------------------------|-------------|-----------------------------|
|                              | LSM<br>%CFB or<br>CFB (SE))    | 95% CI             | LSM<br>%CFB or<br>CFB (SE))    | LSM<br>Difference<br>(97.5% CI) | p-<br>value | LSM<br>%CFB or<br>CFB (SE))   | LSM<br>Difference<br>(97.5% CI) | p-<br>value | LSM<br>%CFB or<br>CFB (SE)) |
| <b>HDL particles, umol/L</b> |                                |                    |                                |                                 |             |                               |                                 |             |                             |
| Baseline, mean (SD)          | 32.2 (6.8)                     |                    |                                | 31.0 (6.3)                      |             |                               | 31.1 (6.6)                      |             | 31.3 (6.6)                  |
| Week 24                      | 0.3 (1.3)                      | -2.3 to 2.9        | 3.1 (1.1)                      | 2.3<br>(-0.3 to 4.8)            | 0.05        | 2.1 (1.1)                     | 1.3<br>(-1.3 to 3.9)            | 0.25        | 0.7 (1.1)                   |
| Week 48                      | 4.3 (1.5)                      | 1.4 to 7.2         | 1.6 (1.3)                      | 3.0<br>(0.01 to 6.0)            | 0.025       | -0.1 (1.3)                    | 1.3<br>(-1.8 to 4.3)            | 0.35        | -1.4 (1.3)                  |
| <b>HDL particle size, nm</b> |                                |                    |                                |                                 |             |                               |                                 |             |                             |
| Baseline, mean (SD)          | 8.9 (0.4)                      |                    |                                | 8.9 (0.4)                       |             |                               | 8.9 (0.4)                       |             | 8.8 (0.3)                   |
| Week 24                      | -0.0 (0.3)                     | -0.7 to 0.6        | 0.2 (0.3)                      | -0.0<br>(-0.7 to 0.6)           | 0.93        | 0.4 (0.3)                     | 0.2<br>(-0.5 to 0.8)            | 0.55        | 0.2 (0.3)                   |
| Week 48                      | 0.2 (0.4)                      | -0.6 to 0.9        | 0.1 (0.3)                      | 0.0<br>(-0.7 to 0.8)            | 0.90        | 0.0 (0.3)                     | -0.0<br>(-0.8 to 0.7)           | 0.80        | 0.1 (0.3)                   |
| <b>IDL particles, nmol/L</b> |                                |                    |                                |                                 |             |                               |                                 |             |                             |
| Baseline, mean (SD)          | 113.9 (98.0)                   |                    |                                | 95.9 (87.5)                     |             |                               | 107.8 (96.7)                    |             | 103.3<br>(94.5)             |
| Week 24                      | 532.6<br>(244.9)               | 52.1 to<br>1013.2  | 96.8<br>(203.6)                | 19.5<br>(-458.2 to<br>497.1)    | 0.93        | 83.3<br>(201.8)               | 6.0<br>(-473.5 to<br>485.5)     | 0.98        | 77.3<br>(201.2)             |
| Week 48                      | 304.1<br>(123.1)               | 62.4 to<br>545.7   | 139.3<br>(106.8)               | 78.7<br>(-169.6 to<br>327.0)    | 0.48        | 62.2<br>(107.7)               | 1.6<br>(-250.9 to<br>254.1)     | 0.99        | 60.6(104.5)                 |
| <b>LDL particles, nmol/L</b> |                                |                    |                                |                                 |             |                               |                                 |             |                             |
| Baseline, mean (SD)          | 1347.8 (449.7)                 |                    |                                | 1311.8 (394.8)                  |             |                               | 1344.7 (399.1)                  |             | 1290.0<br>(430.8)           |
| Week 24                      | -21.7 (2.1)                    | -25.7 to -<br>17.6 | -16.7 (1.7)                    | -13.1<br>(-17.1 to -<br>9.0)    | <0.000<br>1 | -15.5 (1.7)                   | -11.8<br>(-15.9 to -<br>7.8)    | <0.000<br>1 | -3.6 (1.7)                  |

|                                                     |               |                 |              |                        |         |             |                         |         |               |
|-----------------------------------------------------|---------------|-----------------|--------------|------------------------|---------|-------------|-------------------------|---------|---------------|
| Week 48                                             | -21.0 (2.3)   | -25.5 to -16.5  | -15.6 (2.0)  | -13.5 (-18.1 to -8.9)  | <0.0001 | -15.1 (2.0) | -13.1 (-17.7 to -8.4)   | <0.0001 | -2.1 (1.9)    |
| <b>LDL particle size, nm</b>                        |               |                 |              |                        |         |             |                         |         |               |
| Baseline, mean (SD)                                 | 20.3 (0.6)    |                 |              | 20.3 (0.5)             |         |             | 20.4 (0.6)              |         | 20.2 (0.5)    |
| Week 24                                             | -0.3 (0.2)    | -0.7 to 0.20    | 0.1 (0.2)    | 0.1 (-0.4 to 0.5)      | 0.78    | 0.1 (0.2)   | 0.0 (-0.4 to 0.4)       | 0.93    | 0.1 (0.2)     |
| Week 48                                             | 0.7 (0.2)     | 0.2 to 1.1      | 0.6 (0.2)    | 0.3 (-0.2 to 0.7)      | 0.21    | 0.3 (0.2)   | -0.0 (-0.5 to 0.4)      | 0.86    | 0.4 (0.2)     |
| <b>Large HDL particles, umol/L</b>                  |               |                 |              |                        |         |             |                         |         |               |
| Baseline, mean (SD)                                 | 5.4 (2.5)     |                 |              | 5.3 (2.6)              |         |             | 5.3 (2.7)               |         | 5.0 (2.4)     |
| Week 24                                             | 0.8 (6.6)     | -12.0 to 13.6   | 2.0 (5.4)    | -7.5 (-20.3 to 5.2)    | 0.18    | 3.3 (5.4)   | -6.3 (-19.0 to 6.5)     | 0.27    | 9.6 (5.4)     |
| Week 48                                             | 6.2 (4.7)     | -2.9 to 15.4    | 3.6 (4.1)    | -1.30 (-10.7 to 8.1)   | 0.76    | 2.3 (4.1)   | -2.6 (-12.1 to 7.0)     | 0.55    | 4.8 (4.0)     |
| <b>Large LDL particles, nmol/L</b>                  |               |                 |              |                        |         |             |                         |         |               |
| Baseline, mean (SD)                                 | 272.7 (252.1) |                 |              | 304.4 (244.2)          |         |             | 316.6 (266.3)           |         | 263.7 (230.7) |
| Week 24                                             | 63.2 (87.9)   | -108.8 to 236.1 | 96.3 (71.8)  | 57.0 (-105.4 to 219.3) | 0.43    | 71.1 (72.1) | 31.8 (-133.2 to 196.8)  | 0.67    | 39.3 (72.7)   |
| Week 48                                             | 57.4 (104.5)  | -147.8 to 262.5 | 126.6 (89.0) | 29.6 (-169.2 to 228.5) | 0.74    | 60.3 (90.2) | -36.6 (-240.0 to 166.8) | 0.69    | 96.9 (88.8)   |
| <b>Large VLDL and chylomicron particles, nmol/L</b> |               |                 |              |                        |         |             |                         |         |               |
| Baseline, mean (SD)                                 | 8.8 (6.0)     |                 |              | 7.8 (6.0)              |         |             | 8.2 (6.2)               |         | 8.8 (7.6)     |
| Week 24                                             | -9.6 (5.6)    | -20.5 to 1.4    | -4.3 (4.6)   | -13.6 (-24.4 to -2.7)  | 0.0053  | -3.0 (4.6)  | -12.2 (-23.1 to -1.3)   | 0.012   | 9.2 (4.6)     |
| Week 48                                             | -11.8 (6.5)   | -24.5 to 1.0    | -4.5 (5.6)   | -14.9 (-28.0 to -1.8)  | 0.011   | -6.8 (5.7)  | -17.2 (-30.5 to -3.9)   | 0.0038  | 10.4 (5.5)    |
| <b>Medium HDL particles, umol/L</b>                 |               |                 |              |                        |         |             |                         |         |               |
| Baseline, mean (SD)                                 | 4.9 (4.2)     |                 |              | 4.9 (3.6)              |         |             | 5.1 (4.3)               |         | 5.1 (4.6)     |

|                                      |                 |                    |                 |                                  |             |                 |                               |             |                  |
|--------------------------------------|-----------------|--------------------|-----------------|----------------------------------|-------------|-----------------|-------------------------------|-------------|------------------|
| Week 24                              | 157.4<br>(45.1) | 68.8 to<br>245.9   | 173.8<br>(37.2) | 92.5<br>(5.7 to 179.3)           | 0.017       | 163.4<br>(36.9) | 82.1<br>(-5.5 to<br>170.0)    | 0.036       | 81.3 (36.6)      |
| Week 48                              | 165.1<br>(42.3) | 82.1 to<br>248.1   | 191.3<br>(36.3) | 79.9<br>(-3.4 to<br>163.3)       | 0.032       | 151.8<br>(36.5) | 40.5<br>(-44.6 to<br>125.5)   | 0.29        | 111.3<br>(35.2)  |
| <b>Medium VLDL particles, nmol/L</b> |                 |                    |                 |                                  |             |                 |                               |             |                  |
| Baseline, mean (SD)                  | 25.4 (24.4)     |                    |                 | 21.8 (25.6)                      |             |                 | 22.7 (26.1)                   |             | 22.7 (22.3)      |
| Week 24                              | 18.9 (28.4)     | -36.9 to<br>74.7   | 17.6 (23.9)     | -59.6<br>(-115.0 to -<br>4.1)    | 0.016       | 35.1 (23.6)     | -42.1<br>(-97.8 to<br>13.6)   | 0.090       | 77.2 (23.7)      |
| Week 48                              | -19.0<br>(86.5) | -188.8 to<br>150.8 | -22.3<br>(75.9) | -194.3 (-<br>369.8 to -<br>18.9) | 0.013       | 22.2 (76.0)     | -149.9<br>(-328.5 to<br>28.8) | 0.060       | 172.0<br>(73.9)  |
| <b>Small HDL particles, umol/L</b>   |                 |                    |                 |                                  |             |                 |                               |             |                  |
| Baseline, mean (SD)                  | 22.0 (5.7)      |                    |                 | 20.8 (5.2)                       |             |                 | 20.8 (5.4)                    |             | 21.2 (5.5)       |
| Week 24                              | -0.2 (2.9)      | -5.9 to 5.5        | 0.7 (2.4)       | -2.4<br>(-8.0 to 3.3)            | 0.35        | -1.3 (2.4)      | -4.4<br>(-10.1 to 1.3)        | 0.08        | 3.1 (2.4)        |
| Week 48                              | 3.8 (2.7)       | -1.5 to 9.2        | 0.0 (2.4)       | 0.3<br>(-5.2 to 5.8)             | 0.91        | -4.9 (2.4)      | -4.6<br>(-10.2 to 1.0)        | 0.07        | -0.3 (2.3)       |
| <b>Small LDL particles, nmol/L</b>   |                 |                    |                 |                                  |             |                 |                               |             |                  |
| Baseline, mean (SD)                  | 961.3 (356.9)   |                    |                 | 911.6 (311.6)                    |             |                 | 920.3 (316.2)                 |             | 923.0<br>(334.0) |
| Week 24                              | -15.6 (3.5)     | -22.5 to -<br>8.7  | -17.1 (2.9)     | -13.2<br>(-20.0 to -<br>6.3)     | <0.000<br>1 | -15.8 (2.9)     | -11.8<br>(-18.7 to -<br>5.0)  | 0.0001      | -4.0 (2.9)       |
| Week 48                              | -24.5 (2.7)     | -30.1 to -<br>19.5 | -18.3 (2.3)     | -11.5<br>(-17.0 to -<br>6.1)     | <0.000<br>1 | -18.7 (2.4)     | -11.9<br>(-17.5 to -<br>6.4)  | <0.000<br>1 | -6.8 (2.3)       |
| <b>Small VLDL particles, nmol/L</b>  |                 |                    |                 |                                  |             |                 |                               |             |                  |
| Baseline, mean (SD)                  | 27.8 (19.4)     |                    |                 | 23.4 (14.3)                      |             |                 | 24.7 (17.3)                   |             | 23.8 (15.6)      |
| Week 24                              | 88.8 (35.3)     | 19.6 to<br>158.1   | 48.3 (29.4)     | -11.6<br>(-80.0 to<br>56.8)      | 0.70        | 59.7 (29.3)     | -0.1<br>(-69.2 to<br>68.9)    | 0.99        | 59.9 (29.3)      |

|                                               |              |                   |              |                               |             |              |                              |             |                 |
|-----------------------------------------------|--------------|-------------------|--------------|-------------------------------|-------------|--------------|------------------------------|-------------|-----------------|
| Week 48                                       | 79.6 (31.2)  | 18.4 to<br>140.8  | 35.1 (27.1)  | -22.9<br>(-85.4 to<br>39.7)   | 0.41        | 68.1 (27.5)  | 10.2<br>(-53.9 to<br>74.3)   | 0.72        | 57.9 (26.8)     |
| <b>VLDL and chylomicron particles, nmol/L</b> |              |                   |              |                               |             |              |                              |             |                 |
| Baseline, mean (SD)                           | 62.0 (37.1)  |                   | 53.0 (33.9)  |                               |             | 55.6 (37.0)  |                              |             | 55.2 (30.6)     |
| Week 24                                       | -1.5 (6.0)   | -13.3 to<br>10.2  | -0.3 (5.0)   | -18.7<br>(-30.3 to -<br>7.0)  | 0.0003      | 8.5 (4.9)    | -10.0<br>(-21.7 to 1.7)      | 0.056       | 18.5 (4.9)      |
| Week 48                                       | -6.4 (5.7)   | -17.6 to 4.9      | -7.6 (5.0)   | -30.2<br>(-41.7 to -<br>18.6) | <0.000<br>1 | 1.6 (5.0)    | -21.0<br>(-32.8 to -<br>9.2) | <0.000<br>1 | 22.6 (4.9)      |
| <b>VLDL particle size, nm</b>                 |              |                   |              |                               |             |              |                              |             |                 |
| Baseline, mean (SD)                           | 55.4 (6.4)   |                   | 55.7 (6.5)   |                               |             | 55.5 (6.9)   |                              |             | 56.3 (7.3)      |
| Week 24                                       | 1.5 (1.1)    | -0.7 to 3.6       | 0.4 (0.9)    | 1.1<br>(-1.1 to 3.2)          | 0.27        | 1.4 (0.9)    | 2.1<br>(-0.0 to 4.3)         | 0.028       | -0.7 (0.9)      |
| Week 48                                       | 1.1 (1.2)    | -1.3 to 3.4       | 0.6 (1.0)    | 1.9<br>(-0.6 to 4.3)          | 0.085       | 0.2 (1.0)    | 1.4<br>(-1.0 to 3.9)         | 0.19        | -1.2 (1.0)      |
| <b>VLDL and chylomicron TG, mg/dL</b>         |              |                   |              |                               |             |              |                              |             |                 |
| Baseline, mean (SD)                           | 122.1 (70.6) |                   | 108.5 (70.7) |                               |             | 112.5 (72.6) |                              |             | 118.1<br>(81.6) |
| Week 24                                       | -13.4 (3.6)  | -20.5 to -<br>6.3 | -10.4 (3.0)  | -13.4<br>(-20.5 to -<br>6.4)  | <0.000<br>1 | -7.7 (3.0)   | -10.7<br>(-17.8 to -<br>3.6) | 0.0007      | 3.0 (3.0)       |
| Week 48                                       | -16.4 (4.3)  | -24.8 to -<br>8.0 | -14.7 (3.7)  | -21.9<br>(-30.5 to -<br>13.2) | <0.000<br>1 | -10.7 (3.7)  | -17.8<br>(-26.5 to -<br>9.0) | <0.000<br>1 | 7.1 (3.6)       |

<sup>a</sup> Enhanced liver fibrosis (ELF) reported as change from baseline (CFB). All other endpoints reported as percent change from baseline (%CFB). Lipids, lipoprotein particles and lipoproteins are evaluated at Week 24 and Week 48 as LSM %CFB; other analytes as Week 52 LSM CFB. CFB, change from baseline; CI, confidence interval; DB, double-blind; HDL, high-density lipoprotein; HDL-C, high-density lipoprotein cholesterol; IDL, intermediate-density lipoprotein; LDL, low-density lipoprotein; LSM, least squares mean; OL, open-label; RLP, remnant-like particle; SD, standard deviation; SE, standard error; VLDL, very low-density lipoprotein.
